# Supplementary material for: The influence of H-bonding on the ‘ambidentate’ coordination behaviour of the thiocyanate ion to Cd(ii): a combined experimental and theoretical study
Source: Royal Society of Chemistry journal article supplement (doi:10.1039/c3dt53318b), 2014-01-01
Supplement: c3dt53318b1.pdf [file c3dt53318b1.pdf]

## Supporting information

# The influence of H-bonding on the 'ambidentate' coordination behavior of thiocyanate ion to Cd(II): A combined experimental and theoretical study

Alokesh Hazari,<sup>a</sup> Lakshmi Kanta Das,<sup>a</sup> Antonio Bauzá,<sup>b</sup> Antonio Frontera\*<sup>b</sup> and Ashutosh Ghosh\*<sup>a</sup>

<sup>a</sup>Department of Chemistry, University College of Science, University of Calcutta, 92, A.P.C. Road, Kolkata-700 009, India. E-mail: [ghosh\\_59@yahoo.com](mailto:ghosh_59@yahoo.com)

<sup>b</sup>Department of Chemistry, Universitat de les Illes Balears, Crta. de Valldemossa km 7.5, 07122 Palma de Mallorca (Balears), Spain. E-mail: [toni.frontera@uib.es](mailto:toni.frontera@uib.es).

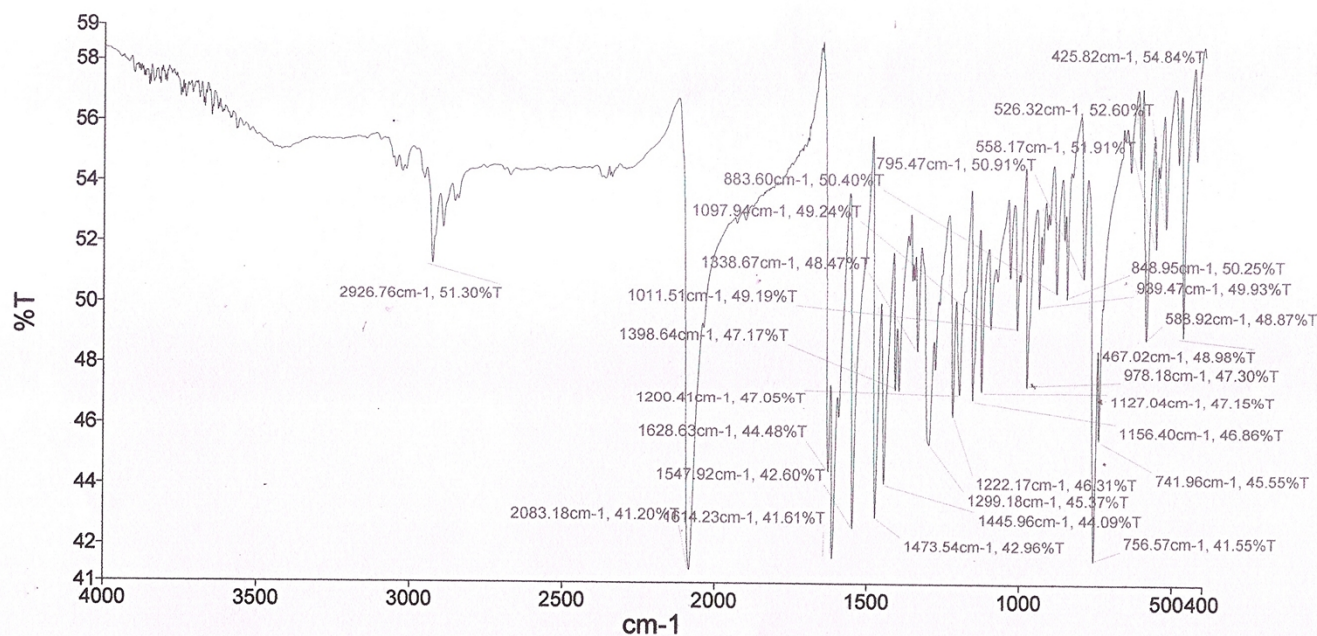

Fig. S1. IR spectrum of complex 1.

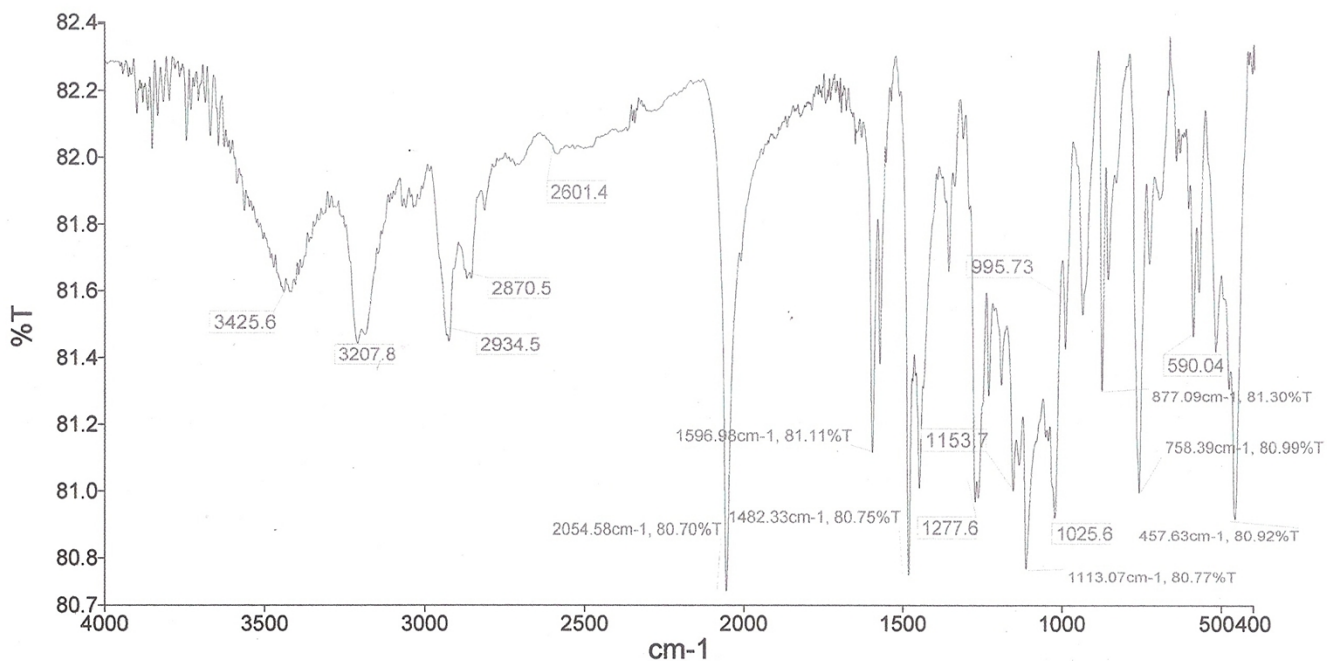

Fig. S2. IR spectrum of complex 2.

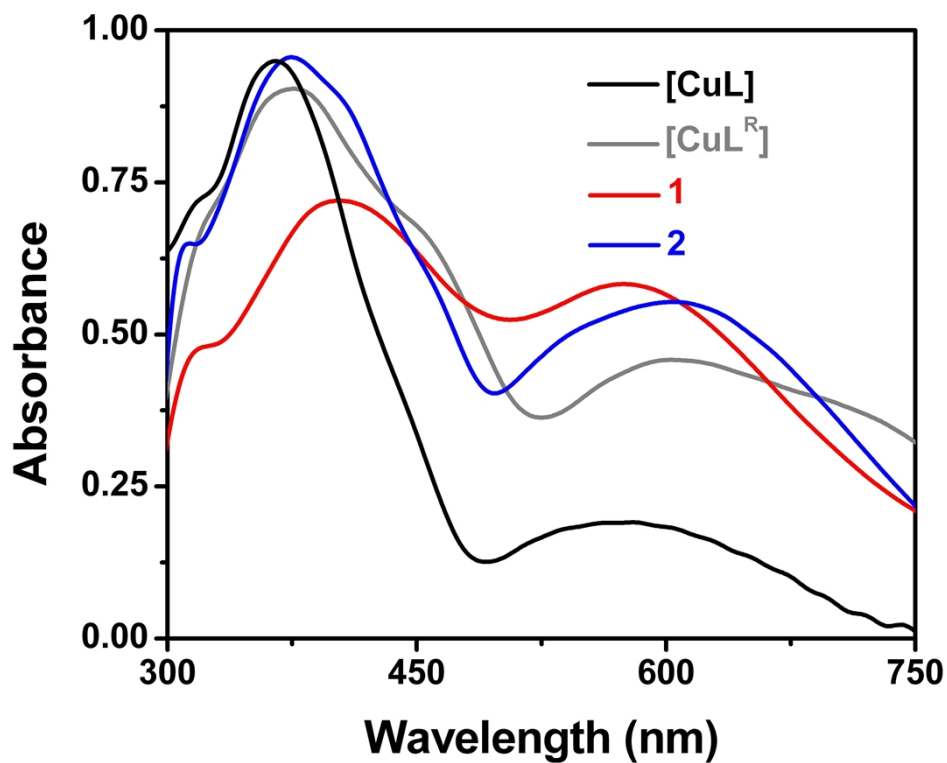

Fig. S3. UV-Vis spectra of “metalloligands” and trinuclear complexes in solid state.

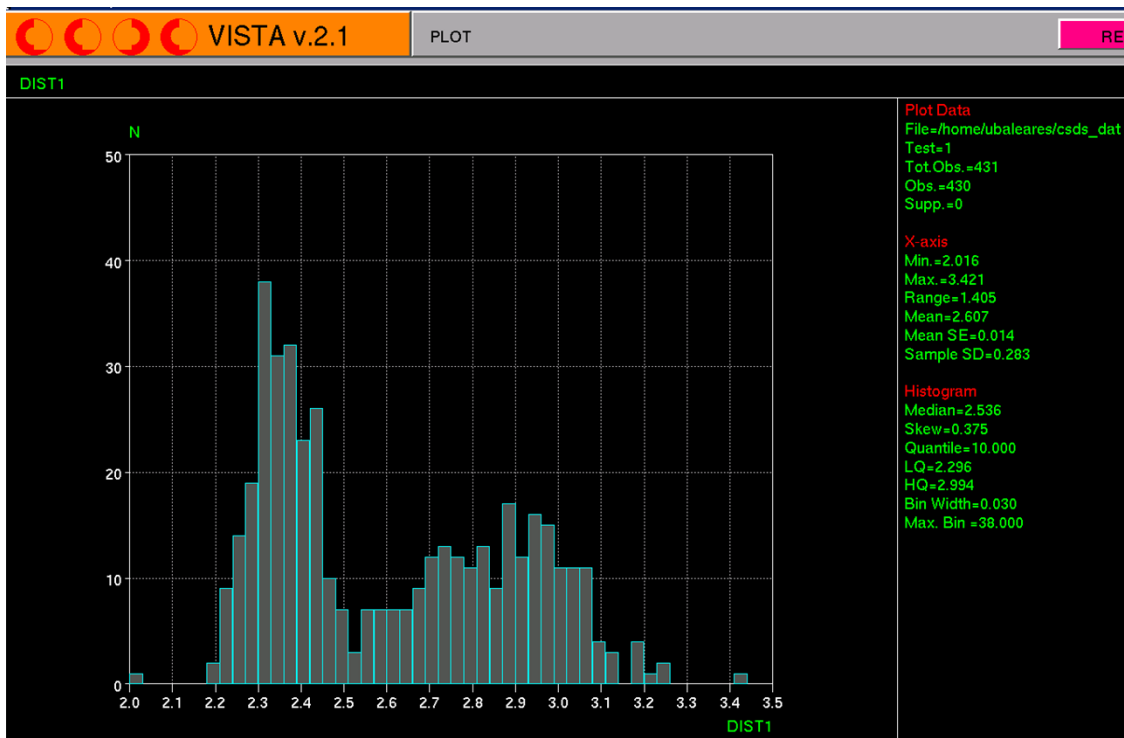

**Fig. S4.** Histogram plot for the Cu-SCN distance.
